# Supplementary material for: Host preferences support the prominent role of Hyalomma ticks in the ecology of Crimean-Congo hemorrhagic fever
Source: PLoS Negl Trop Dis. 2018 Feb 8;12(2):e0006248. doi: 10.1371/journal.pntd.0006248 (PMC5821391; doi:10.1371/journal.pntd.0006248)
Supplement: S1 Data — (XLSX) [file pntd.0006248.s019.xlsx]

## Sheet: Families BNC%
	Hyalomma L	Hyalomma N	Hyalomma A	Dermacentor L	Dermacentor N	Dermacentor A	Amblyomma L	Amblyomma N	Amblyomma A	Rhipicephalus L	Rhipicephalus N	Rhipicephalus A	Ixodes L	Ixodes N	Ixodes A
Accipitridae	0	0	0			0		1.54072	0	0.325513	0.0525198	1.01595
Agamidae		0	0				0	0	0.273374				0	0.118498
Alaudidae	0	2.84818								2.55636	2.21369	0	2.39445	0.257532	0.622143
Alcedinidae										0	0		0		0
Anatidae								0				0
Anguidae													0
Ardeidae			0
Atractaspidinae
Bathyergidae													0	0	0
Bovidae	3.38116	4.09377	27.9566			70.8333	57.0266	55.5376	36.3272	23.887	27.6441	47.9055	7.42854	12.1618	11.3067
Bucorvidae								0
Burhinidae			0						0			0
Calomyscidae
Camelidae	0.0910318	0	4.12187					0.407026	1.09413	0.0579018	0.0465723	0.126229
Canidae		0.811168	8.42016		0	0	0.129572	3.23007	1.81009	2.71202	2.38722	15.0474	6.50553	8.70516	19.0208
Cercopithecidae								0	0		0	0.785578	0	0	0
Cervidae			1.11415							0	0	0.0474146		0.0325088
Chamaeleonidae		0					0	0.793029
Chitonidae									0
Chrysochloridae													0		0
Ciconiidae								0.165754	0			0
Coliidae										0.184623	0.142311
Coraciidae		0
Cricetidae	0	0	0	0	0					0	0		7.79514	7.69582	1.7152
Crocodylidae									0
Ctenodactylidae										0	0	0
Dipodidae	0.359044	0.302588								0.22255	0.131813		0.0744486	0.144282	0
Dotidae								0	0			0.00995715
Elephantidae						0	0	0	0.0804084			0.244594
Emydidae													0	0
Equidae			5.09544					0	0.244188	3.0145	1.58714	6.37931	0.591311	0	0.0203979
Erinaceidae	10.1459	5.42708	0.791433	0	0	0	0	0	0	0.978028	0.131813	1.47486	2.39025	4.09032	2.02231
Falconidae	6.09854	1.71267													0
Felidae			1.33165				0	4.44874	2.47841	0.459257	5.07892	7.26794	1.52049	3.80668	5.526
Fregatidae							0	0	0
Gekkonidae
Gerrhosauridae								0
Giraffidae			0						0.1952			1.49724			0
Gliridae		0		0	0					0.241979	0	0.0617621	0.11711	0.115555	0.245786
Gruidae
Herpestidae	0	0	0				0	0	0	0.687663	1.6492	0.715998	0	0	2.84284
Hippopotamidae							0	0.751176	0.40992
Hirundinidae				0						0	0	0	0.850675	0.259959	3.27357
Hyaenidae								1.00418	0.275914	2.25614	0.968518	1.63093		0.144343	0.0701754
Hystricidae	0	0					0		0	0.838491	3.46222	0.286646		0	0
Lacertidae	0.813321	6.93182	0	0	0		0			0	0	0	0.11711	0.115555	0.0257965
Laniidae	0					0						0
Laridae									0				0	0	0
Leporidae	51.3721	50.6139	15.1174	0	0			0		16.6009	15.8846	5.9604	17.3789	12.1969	11.0247
Macropodidae													0	0
Macroscelidea
Macrostylidae	0	0								0.56681	0.923712		0.55666	0.384696	0.0458506
Malaconotidae										0	0				0
Manidae							0	0	0			0.105731
Meropidae													0	0
Moschidae
Motacillidae	0	0		0			0						0.333952	0.257532	0.622143
Muridae	24.4948	22.0899	1.53706	100	100		4.78985	0		21.7581	20.1049	2.20952	35.1983	33.9315	19.9737
Musophagidae								0	0
Mustelidae	0			0	0					0.383638	0.934858	1.16494	1.4958	3.15173	5.00872
Nandiniidae
Nesomyidae													0	0	2.07405
Numididae	0.544721	0.893564					5.16954	4.2704	0	5.24454	1.67211	0.0812411			0
Ochotonidae	0.721029	0								0.343453	0.039577	0.0366145	0	0	0
Orycteropodidae											0	0.525302
Otididae												0.0448303
Pedetidae	0	0								0.185789	0.600241	0.0252032
Pelomedusidae									0
Phalacrocoracidae										0	0	0
Phalangeridae													0
Phylloscopidae													0.333952	0.257532	0
Picidae	0	0								0	0		0	0
Pittidae							0	0	0
Potoroidae														0
BNCocaviidae
BNCocyonidae
Ranidae				0	0
Rhinocerotidae			0.562515						1.48794		0	0.795766
Rhinolophidae													0	0
Rhinopomatidae												0
Sagittariidae												0
Scincidae									0				0	0
Sciuridae	0	0						0.996017		6.28818	4.9284	1.36983	3.1378	4.38141	7.69272
Scolopacidae
Soricidae	0	0							0		0	0.0593261	9.40427	6.68553	4.54742
Spalacidae										0	0		0.0799088	0.062429	0.4681
Strigidae	1.97838	2.13764	9.96354					0		0		0	2.29536	1.04275	0.367802
Struthionidae			14.0324						1.4756			0.0367998
Suidae	0	0	6.42308			29.1667	3.7643	2.51585	11.4714	10.2066	8.54816	3.01798	0	0	1.40501
Sulidae							0	0	0
Talpidae				0	0								0	0
Tenrecidae															0
Testudinidae	0	0	3.53274				24.3793	13.8743	29.5388			0
Threskiornithidae
Thryonomyidae							1.20809	0.137704	0	0	0.86737	0.0692369		0	0
Tryonicidae									0
Tupaiidae														0
Tytonidae														0	0
Upupidae	0	2.13764						0
Ursidae														0	0.0780842
Varanidae						0	0.877606	8.55339	12.2283
Vespertilionidae										0	0	0	0
Viperidae							2.6552	1.774	0.609166				0
Vombatidae															0
